# Supplementary material
Source: publisher figshare collection journal article supplement (https://diabetesjournals.figshare.com/ndownloader/files/32118218)
Supplement: Supplementary file 1 [file 32118218]

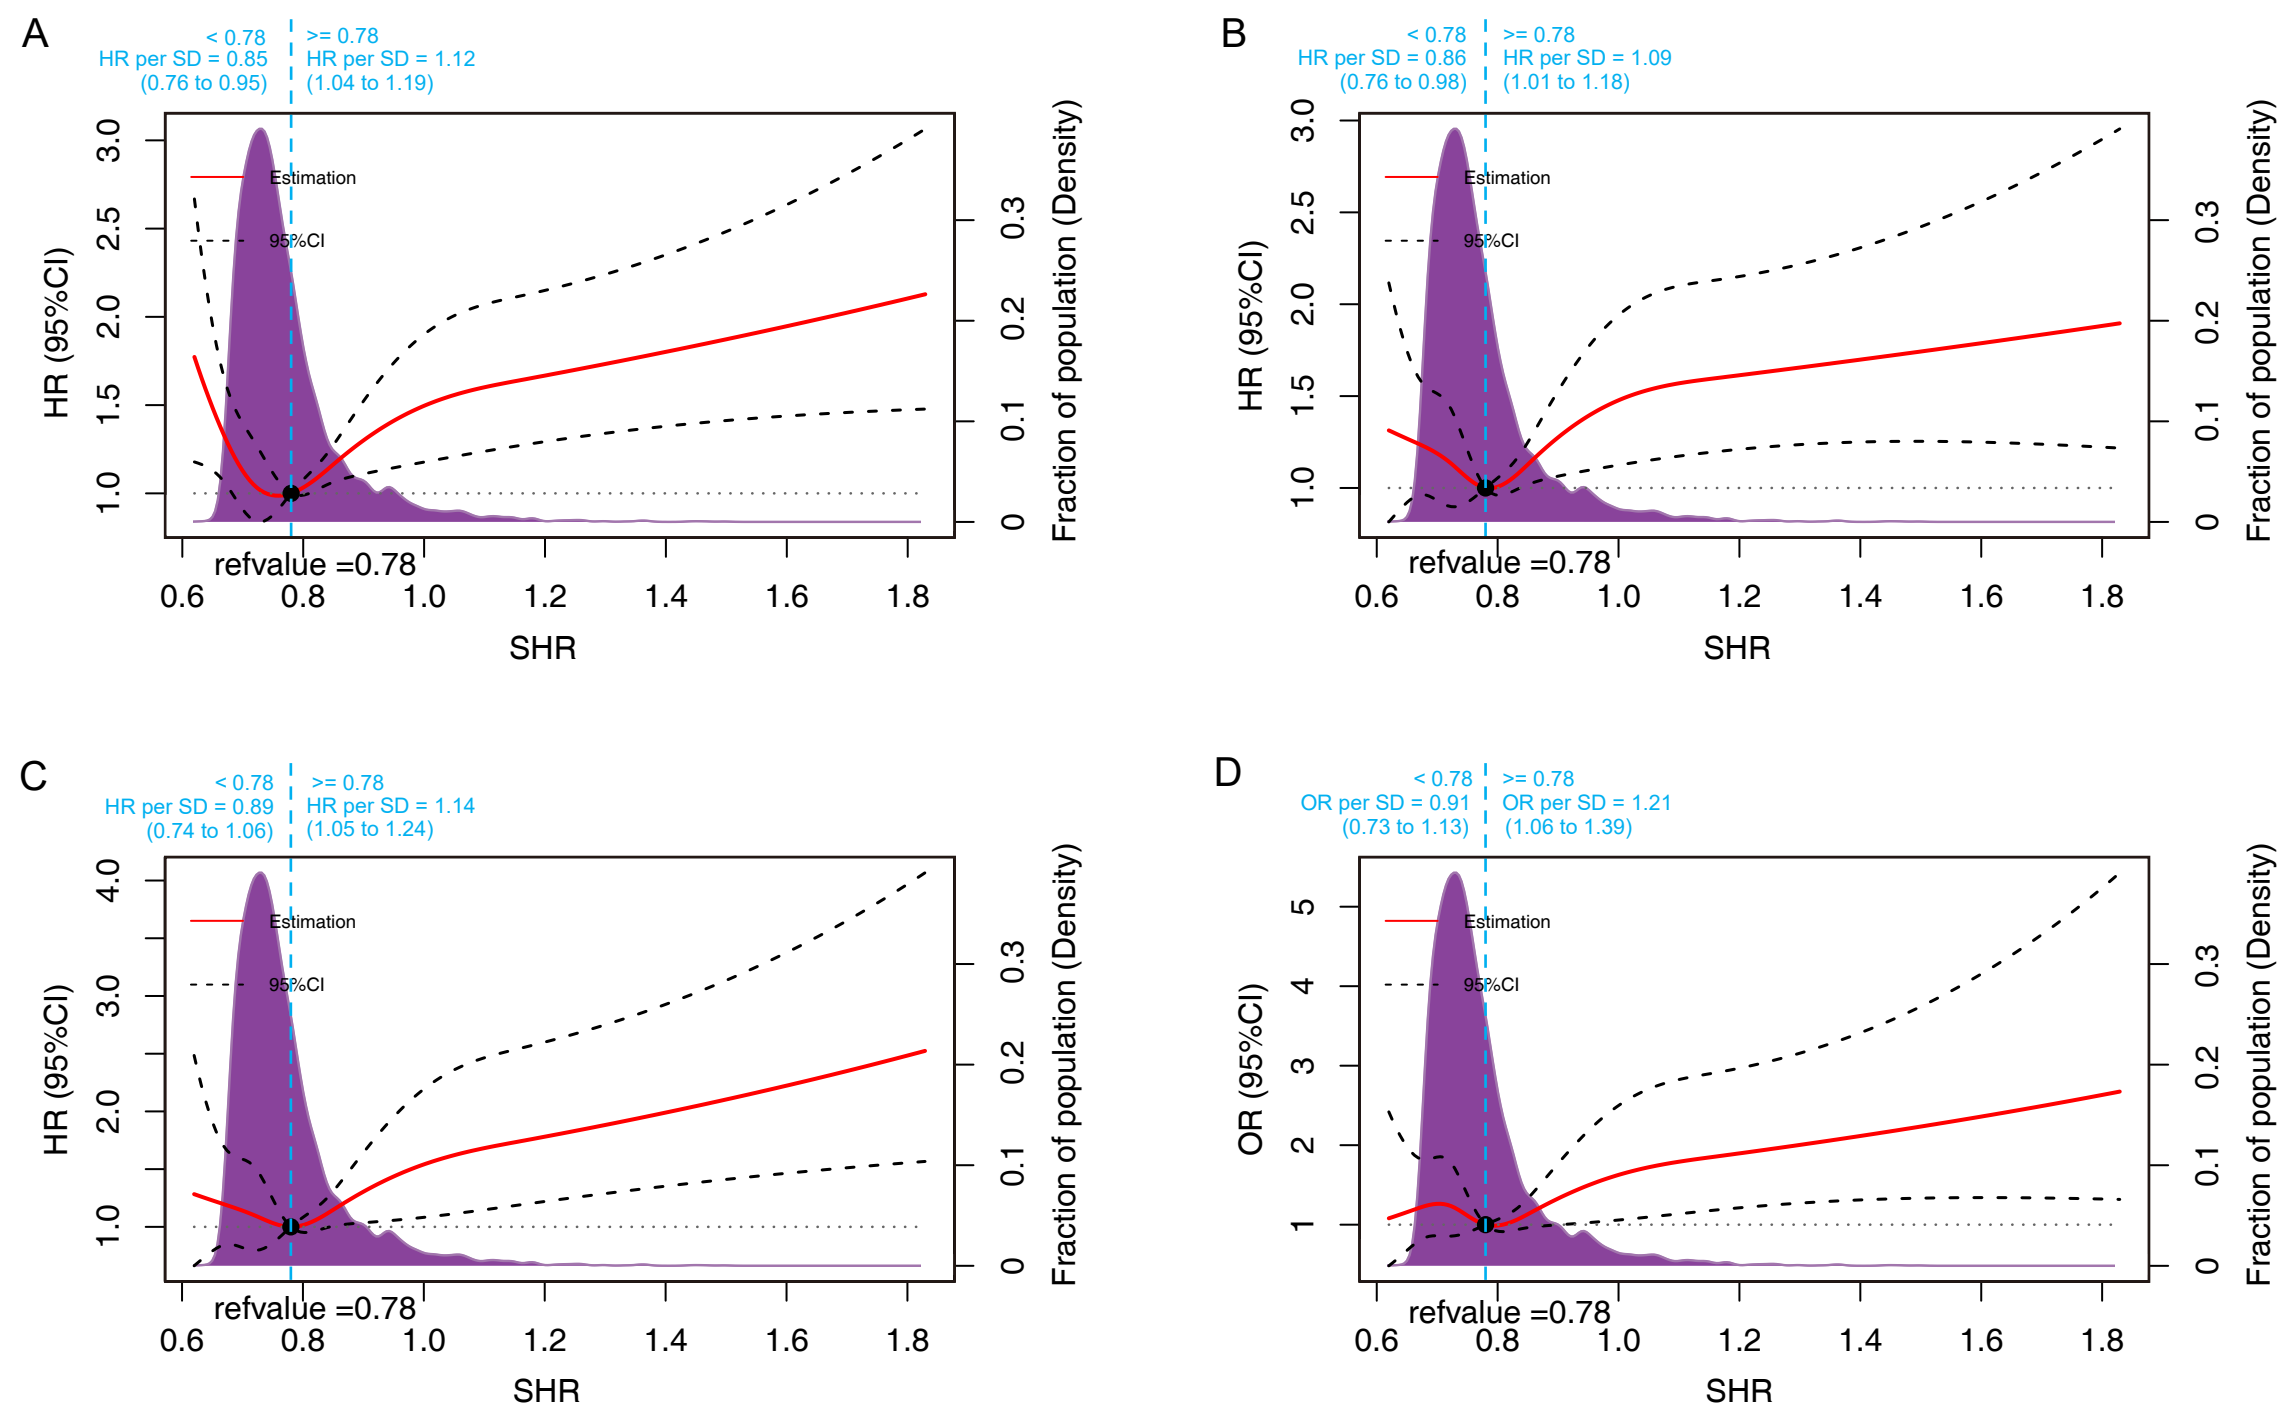

Supplementary Figure 2 | association of SHR and poor cardiovascular prognosis.

A: SHR and MACCEs at two-year follow-up;

B: SHR and MACEs at two-year follow-up;

C: SHR and cardiac death and MI at two-year follow-up; D: SHR and in-hospital cardiac death and nonfatal MI.

The analysis of A was adjusted for age, previous stroke, previous PCI, SYNTAX score, 3-vessel disease, the application of IABP, LVEF, HDL-C and DAPT at discharge; the analysis of B was adjusted for previous PCI, SYNTAX score, 3-vessel disease, application of IABP, LVEF, HDL-C and DAPT at discharge for MACEs; the analysis of C was adjusted for previous PCI, SYNTAX score, 3-vessel disease, number of stents, application of IABP, LVEF, TC, LDL-C, HDL-C, DAPT and statin at discharge; the analysis of D was adjusted for diagnosis on admission, previous MI, BMI, SYNTAX score, 3-vessel disease, number of stents, application of IABP, LVEF, low-T3 syndrome, TC, HDL-C, LDL-C, HbA1c, DAPT and statin at discharge.

Hazard ratios are indicated by red solid lines and 95% CIs by black dotted line. Density plot are presented by purple shadow area. SHR corresponding to the HR equal to 1 (refvalue) are shown by dark spot. All P values for non-linearity < 0.05.
